# Supplementary material for: Evaluation of MAA Analogues as Potential Candidates to Increase Photostability in Sunscreen Formulations
Source: MDPI journal article supplement (doi:10.3390/photochem4010007), 2024-02-06
Supplement: s1 [file s1]

# Electronic Supporting Information

## Evaluation of MAA Analogues as Potential Candidates to Increase Photostability in Sunscreen Formulations

Jacobo Soilán <sup>1</sup>, Leonardo López-Cóndor <sup>1</sup>, Beatriz Peñín <sup>1</sup>, José Aguilera <sup>2,3</sup>, María Victoria de Gálvez <sup>2,3</sup>,  
Diego Sampedro <sup>1,\*</sup> and Raúl Losantos <sup>1,\*</sup>

<sup>1</sup> Departamento de Química, Instituto de Investigación en Química (IQUR), Complejo Científico Tecnológico, Universidad de La Rioja, Madre de Dios 53, 26006 Logroño, Spain; jacobsoilan@gmail.com (J.S.); bepenin@unirioja.es (L.L.-C.); lelopec@unirioja.es (B.P.)

<sup>2</sup> Department of Dermatology and Medicine, Faculty of Medicine, University of Malaga, Campus Universitario de Teatinos s/n, 29071 Malaga, Spain; jaguilera@uma.es (J.A.); mga@uma.es (M.V.d.G.)

<sup>3</sup> Photodermatology Laboratory, Medical Research Center, University of Malaga, Campus Universitario de Teatinos s/n, 29071 Malaga, Spain

\* Correspondence: diego.sampedro@unirioja.es (D.S.); raul.losantos@unirioja.es (R.L.)

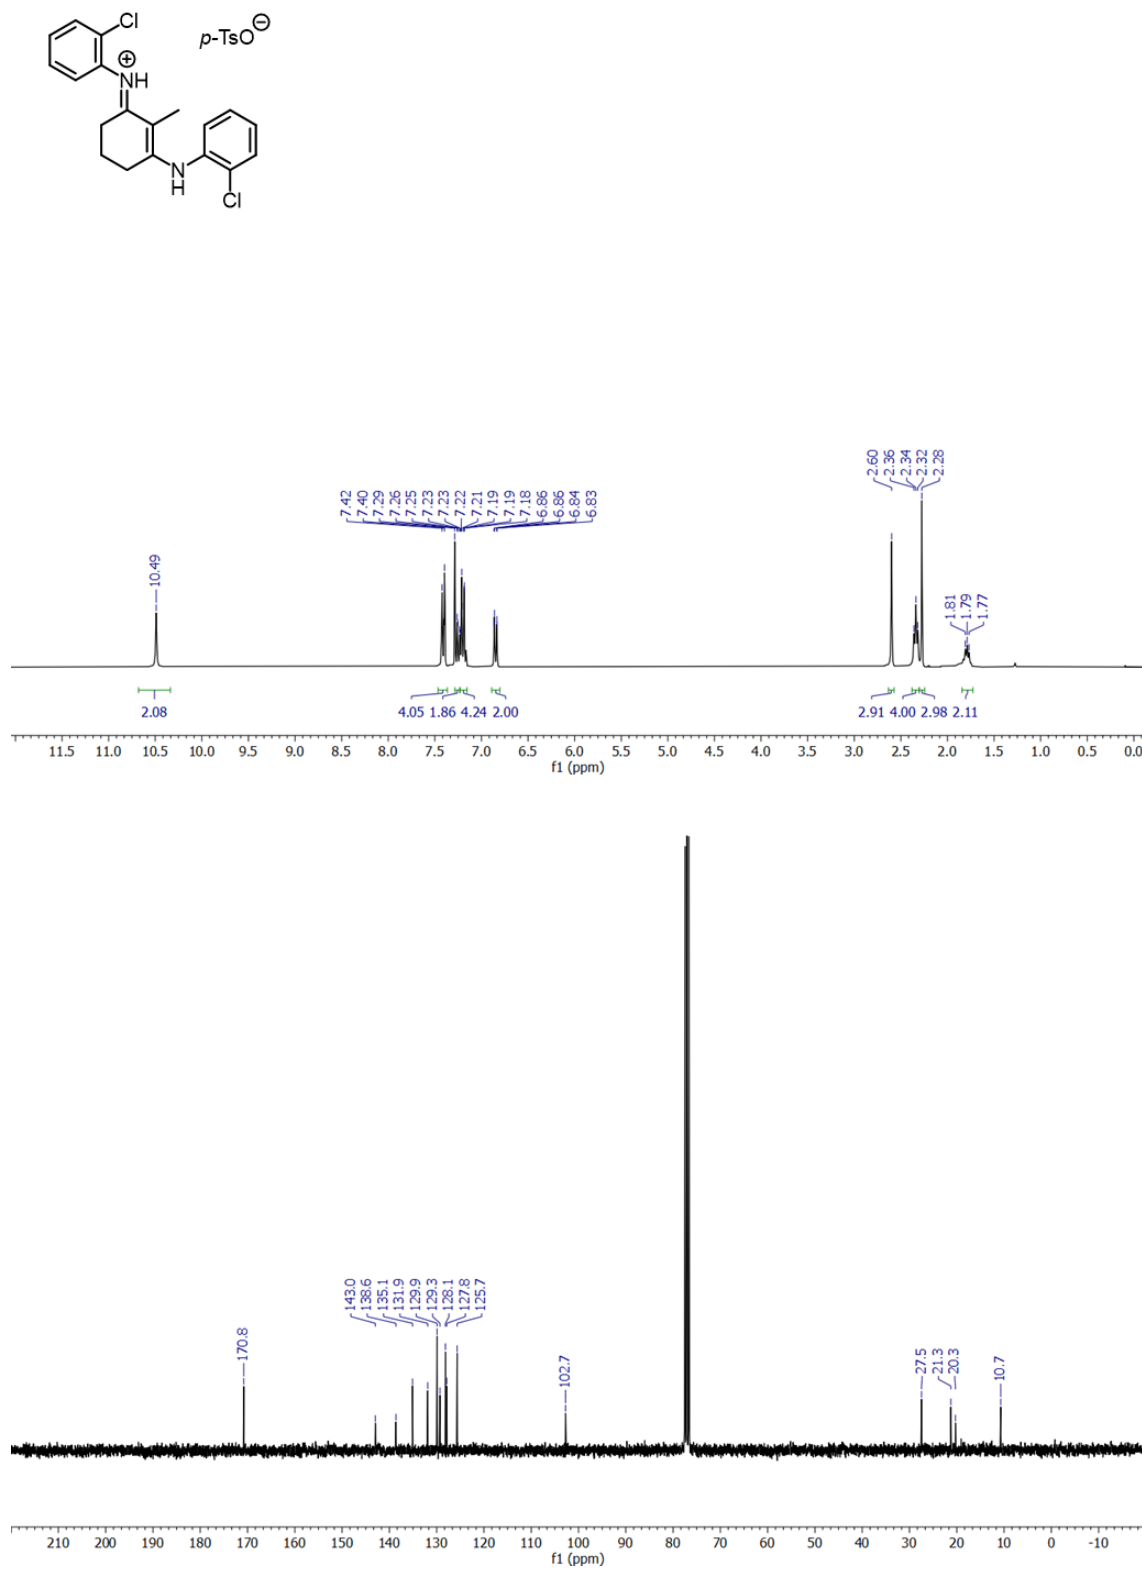

Figure S1. NMR spectra of **1**.

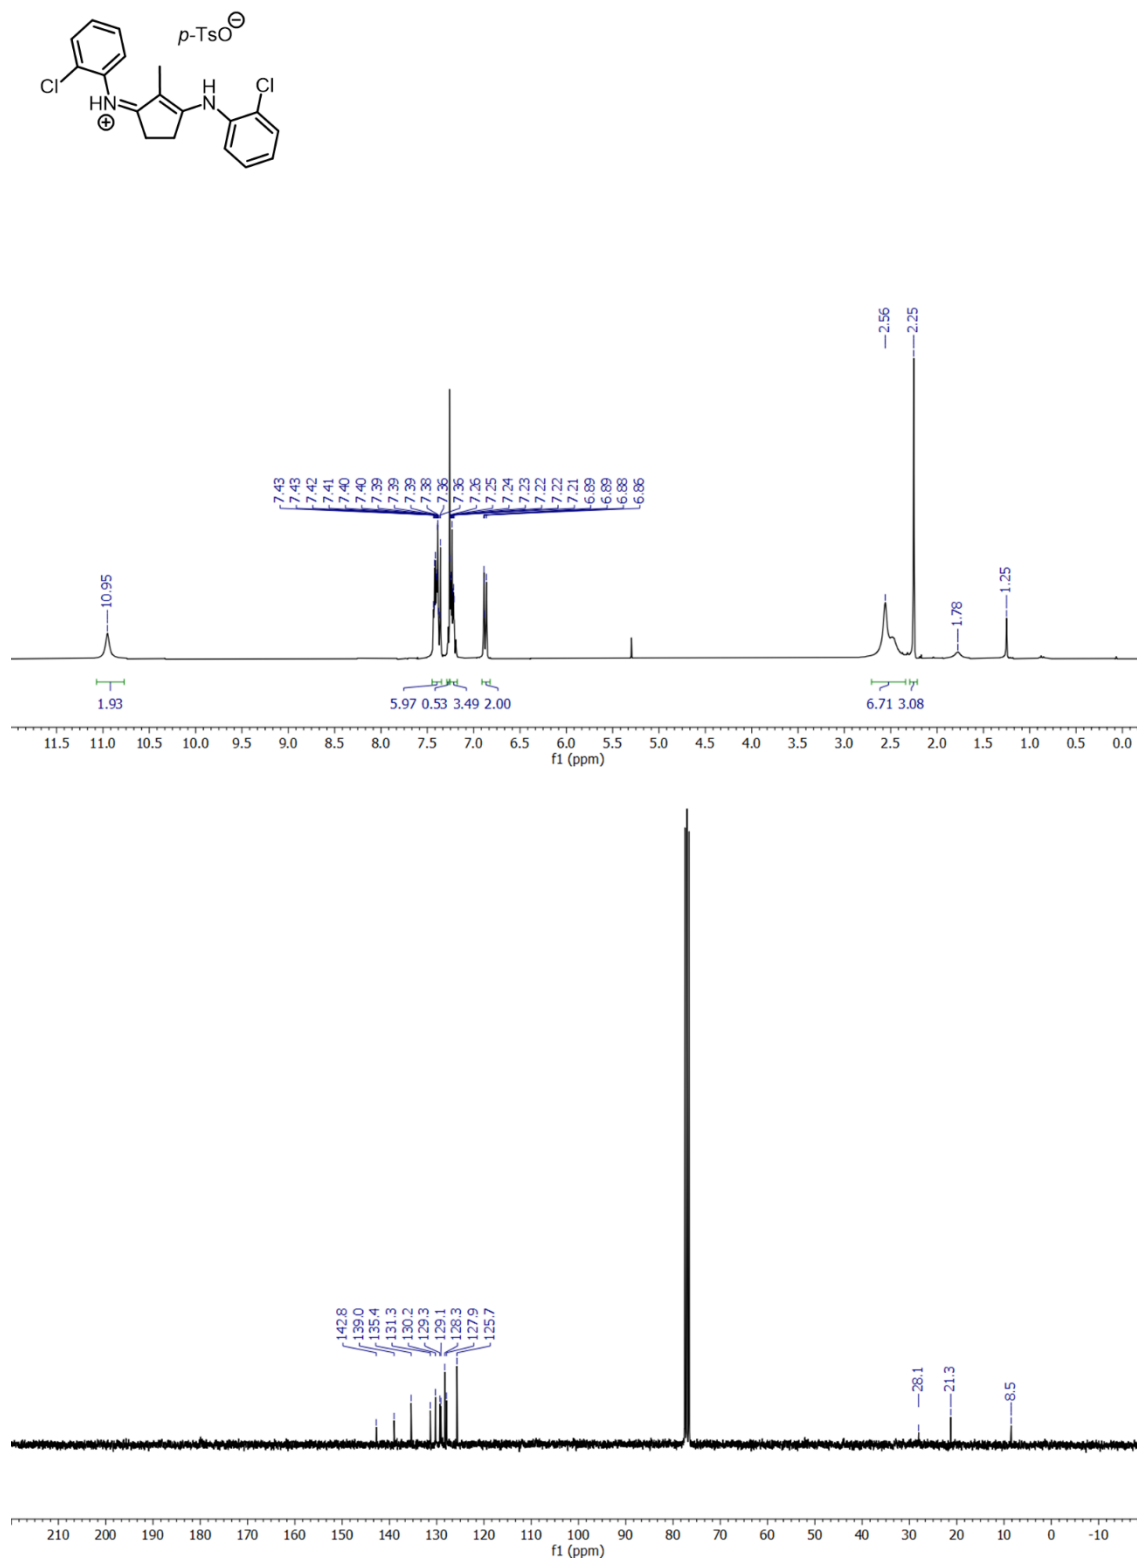

Figure S2. NMR spectra of **3**.

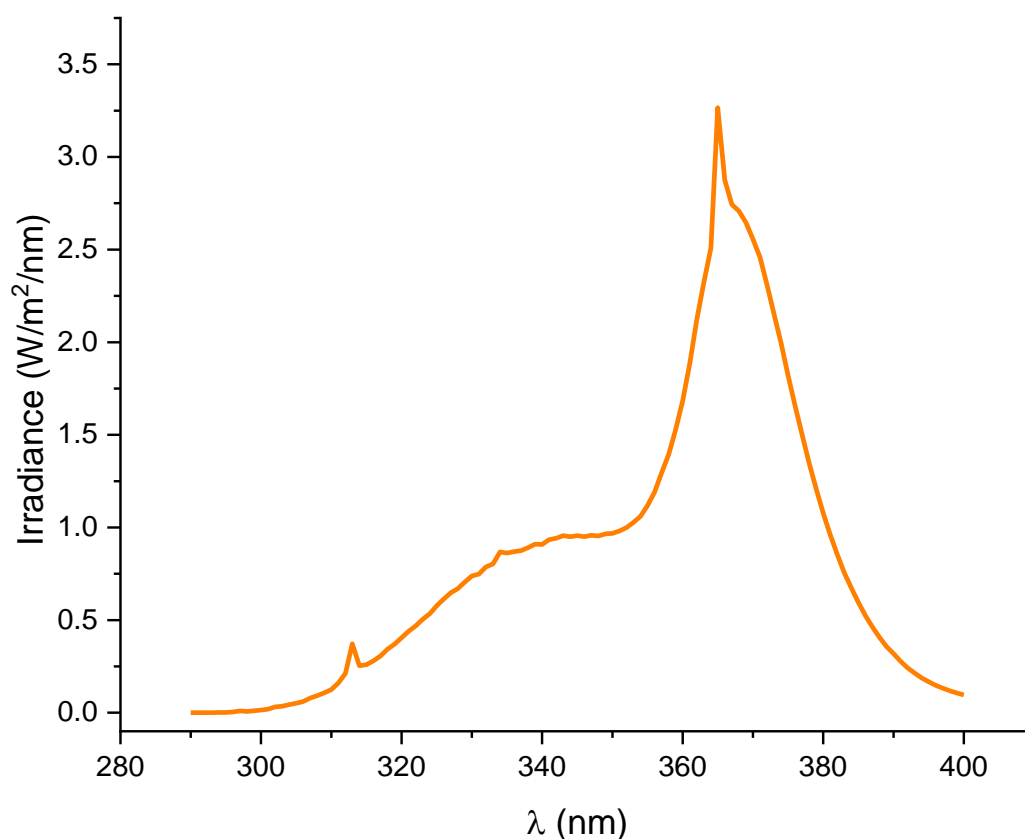

Figure S3. Spectral irradiance used for the irradiation experiments.

### 1. Composition of the formulations:

- Neo PCL 20-30%: Beewax 10 – 25 %, Stearyl alcohol 10 – 25 %, Stearyl heptanoate 10 – 25 %, Steareth-7 5 – 10 %, Steareth-10 5 – 10 %, Stearyl caprylate 5 – 10 %, Dimethicone 1 – 5 %, Myristyl alcohol 1 – 5 %, Isopropyl myristate 1 – 5 %, Mineral oil (paraffinum liquid) 1 – 5 %.
- Bidistilled water 60-80% (to completeness)
- Active Sunscreen ingredient 5%-10%: **Avo, Octo, 1, 2, 3, 4.**
- PEG: 2 drops

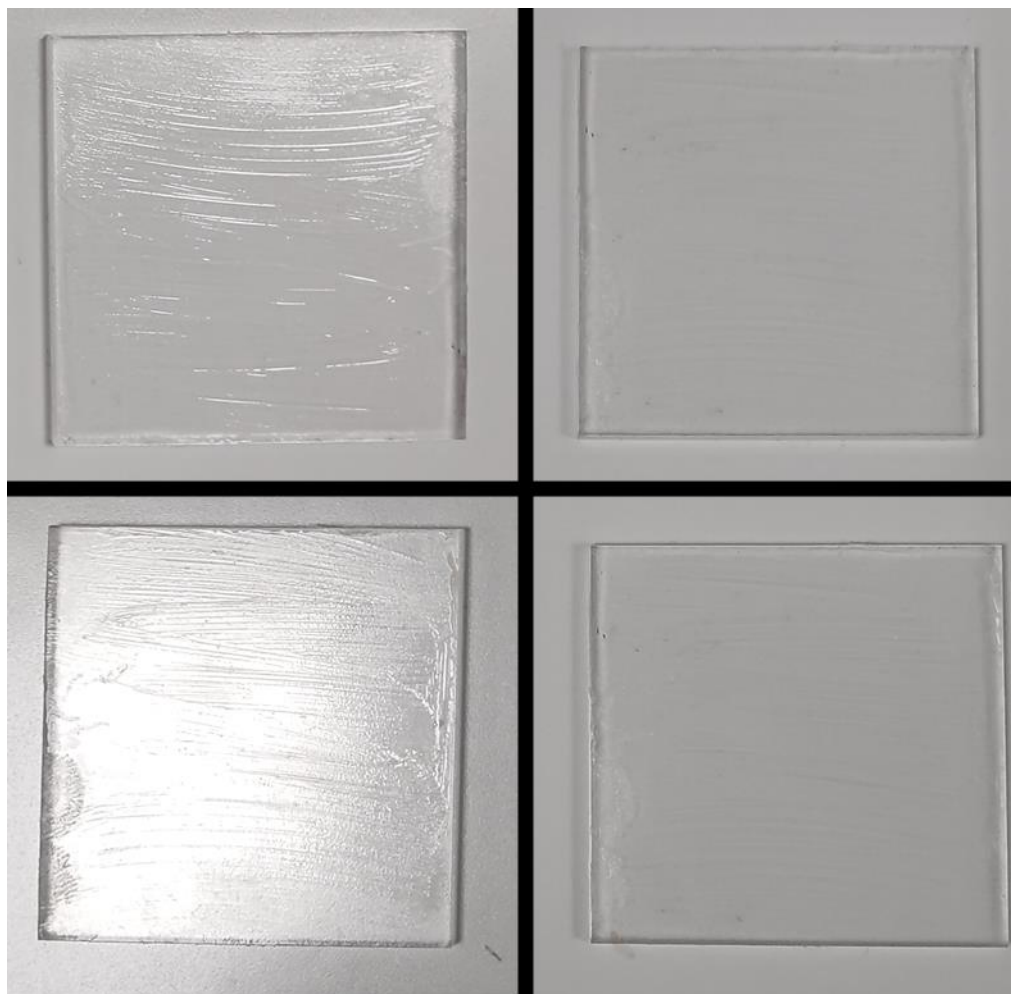

Figure S4. PMMA plates with the prepared formulations of **1-4** at 5%.
